# Supplementary material
Source: PubMed Central journal article supplement (PMC7231655)
Supplement: NIHMS1564228-supplement-2.pdf [file NIHMS1564228-supplement-2.pdf]

Supplemental Figure 2: Overall response to pembrolizumab monotherapy (n=31, left) and combination therapy (n=34\*, right).

### Pembrolizumab

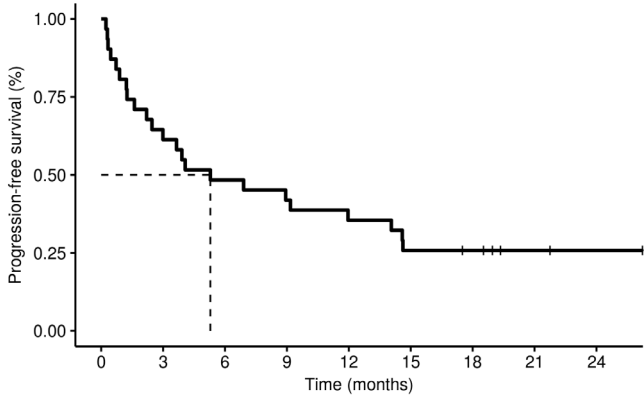

Number at risk

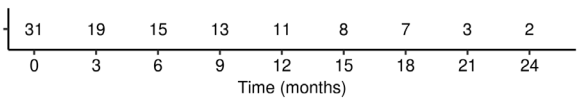

### Pembro + Chemotherapy

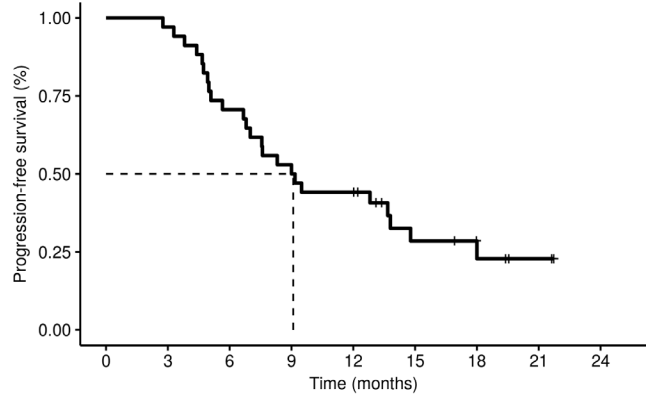

Number at risk

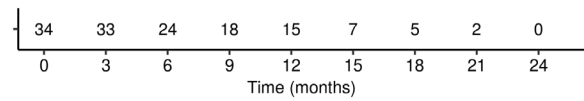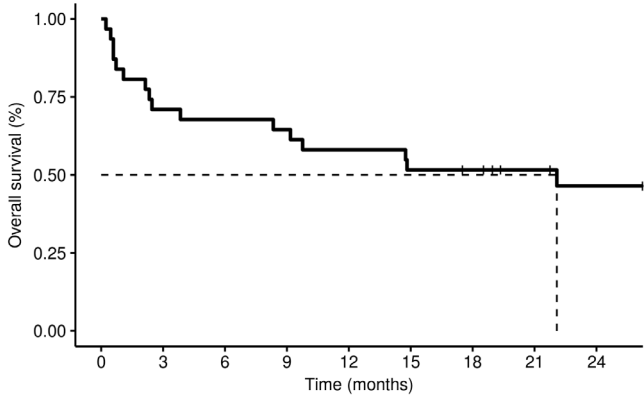

Number at risk

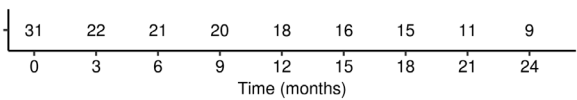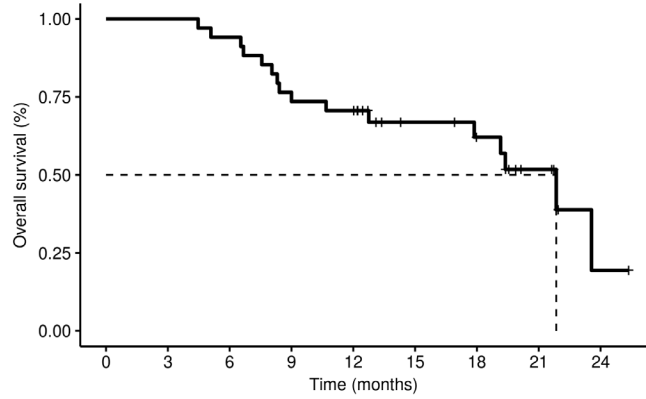

Number at risk

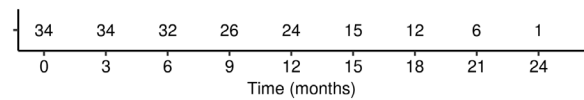

\*One patient who received PC was lost to follow-up and unevaluable for OS and PFS.
