# Supplementary material
Source: PubMed Central journal article supplement (PMC7231655)
Supplement: NIHMS1564228-supplement-3.pdf [file NIHMS1564228-supplement-3.pdf]

A

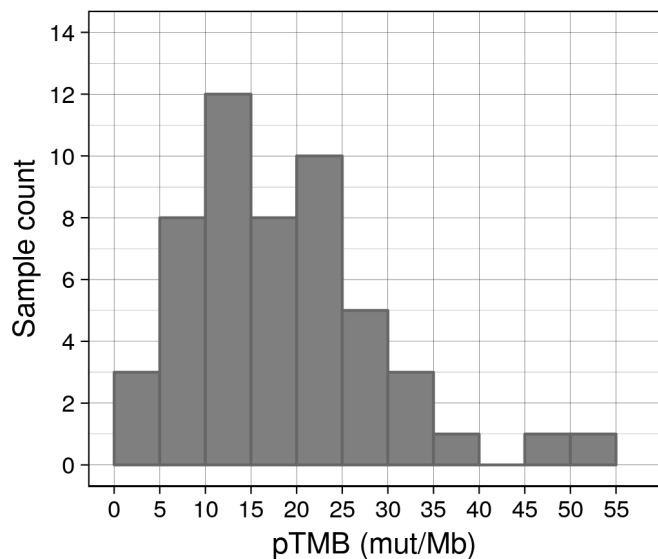

Distribution of pTMB values for 52 pTMB-evaluable patients.

B

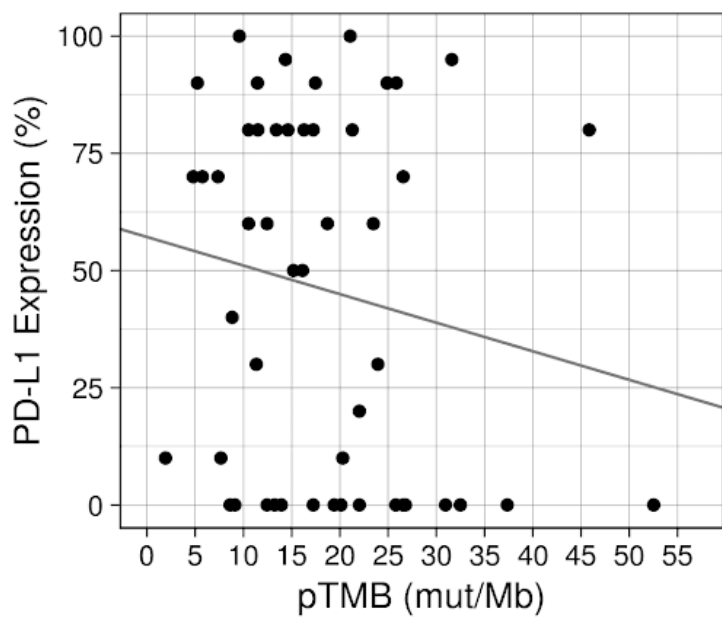

Spearman's rank coefficient =  $-0.134$  ( $p=0.348$ ) for 52 pTMB-evaluable patients.
