# Supplementary material
Source: PubMed Central journal article supplement (PMC7231655)
Supplement: NIHMS1564228-supplement-4.pdf [file NIHMS1564228-supplement-4.pdf]

**Supplemental Table 1. Mutations Analyzed**

| <b>Gene</b>      | <b>Mutation</b>                                        | <b>P-value for PFS</b> | <b>P-value for OS</b> |
|------------------|--------------------------------------------------------|------------------------|-----------------------|
| ERBB2            | Ex20 insertion                                         | 0.110                  | <b>0.016</b>          |
| STK11/KEAP1/PTEN | Any loss of function frameshift or truncating mutation |                        |                       |
| KRAS             | G12D, G12V, G12R, G12C, G12A, G12S, G13C, G13D, Q61H   | 0.572                  | 0.211                 |
| PIK3CA           | E542K, E545K, E545Q                                    | 0.791                  | 0.982                 |
| FGA              | Fraction of genome aneuploidy (continuous variable)    | 0.105                  | 0.662                 |
